# Supplementary material for: Neighborhood Disadvantage and Tobacco Retail Outlet and Vape Shop Outlet Rates
Source: PubMed Central journal article supplement (PMC7215286; doi:10.3390/ijerph17082864), 2020-04-21
Supplement: ijerph-17-02864-s001.pdf [file ijerph-17-02864-s001.pdf]

# Neighborhood Disadvantage and Tobacco Retail Outlet and Vape Shop Outlet Rates

David C. Wheeler <sup>1,2,\*</sup>, Elizabeth K. Do <sup>2,3</sup>, Rashelle B. Hayes <sup>2,4</sup>, Kendall Fugate-Laurs <sup>3</sup>, Westley L. Fallavollita <sup>3</sup>, Colleen Hughes <sup>5</sup> and Bernard F. Fuemmeler <sup>2,3</sup>

<sup>1</sup> Department of Biostatistics, Virginia Commonwealth University, Richmond, Virginia, USA

<sup>2</sup> Massey Cancer Center, Virginia Commonwealth University, Richmond, Virginia, USA

<sup>3</sup> Department of Health Behavior & Policy, Virginia Commonwealth University, Richmond, Virginia, USA

<sup>4</sup> Department of Psychiatry, Virginia Commonwealth University, Richmond, Virginia, USA

<sup>5</sup> Department of Behavioral Health & Developmental Services, Richmond, Virginia, USA

\* Correspondence: david.wheeler@vcuhealth.org

Table S1. Census tracts with significantly elevated relative risk for tobacco retail outlets

| FIPS  | County              | Census Tract         |
|-------|---------------------|----------------------|
| 51001 | Accomack County     | Census Tract 901     |
| 51001 | Accomack County     | Census Tract 902     |
| 51001 | Accomack County     | Census Tract 904     |
| 51001 | Accomack County     | Census Tract 908     |
| 51001 | Accomack County     | Census Tract 906     |
| 51001 | Accomack County     | Census Tract 907     |
| 51009 | Amherst County      | Census Tract 105.04  |
| 51011 | Appomattox County   | Census Tract 401     |
| 51013 | Arlington County    | Census Tract 1036.02 |
| 51015 | Augusta County      | Census Tract 709     |
| 51015 | Augusta County      | Census Tract 701     |
| 51017 | Bath County         | Census Tract 9201    |
| 51025 | Brunswick County    | Census Tract 9302.03 |
| 51025 | Brunswick County    | Census Tract 9302.01 |
| 51027 | Buchanan County     | Census Tract 102     |
| 51027 | Buchanan County     | Census Tract 101     |
| 51027 | Buchanan County     | Census Tract 106     |
| 51031 | Campbell County     | Census Tract 209     |
| 51031 | Campbell County     | Census Tract 207     |
| 51035 | Carroll County      | Census Tract 806.02  |
| 51035 | Carroll County      | Census Tract 801     |
| 51035 | Carroll County      | Census Tract 802     |
| 51037 | Charlotte County    | Census Tract 9301    |
| 51037 | Charlotte County    | Census Tract 9302    |
| 51037 | Charlotte County    | Census Tract 9303    |
| 51041 | Chesterfield County | Census Tract 1003    |
| 51051 | Dickenson County    | Census Tract 402     |
| 51051 | Dickenson County    | Census Tract 403     |
| 51051 | Dickenson County    | Census Tract 401     |

|       |                      |                      |
|-------|----------------------|----------------------|
| 51057 | Essex County         | Census Tract 9507    |
| 51059 | Fairfax County       | Census Tract 4516.01 |
| 51059 | Fairfax County       | Census Tract 4802.02 |
| 51059 | Fairfax County       | Census Tract 4525.01 |
| 51059 | Fairfax County       | Census Tract 4520    |
| 51063 | Floyd County         | Census Tract 9201.02 |
| 51067 | Franklin County      | Census Tract 208     |
| 51067 | Franklin County      | Census Tract 202     |
| 51071 | Giles County         | Census Tract 9303    |
| 51073 | Gloucester County    | Census Tract 1003.01 |
| 51077 | Grayson County       | Census Tract 602.01  |
| 51081 | Greensville County   | Census Tract 8802    |
| 51083 | Halifax County       | Census Tract 9306    |
| 51083 | Halifax County       | Census Tract 9302.01 |
| 51083 | Halifax County       | Census Tract 9308    |
| 51083 | Halifax County       | Census Tract 9304    |
| 51085 | Hanover County       | Census Tract 3206.02 |
| 51085 | Hanover County       | Census Tract 3206.01 |
| 51087 | Henrico County       | Census Tract 2008.02 |
| 51089 | Henry County         | Census Tract 106.02  |
| 51089 | Henry County         | Census Tract 106.01  |
| 51089 | Henry County         | Census Tract 113     |
| 51089 | Henry County         | Census Tract 103     |
| 51089 | Henry County         | Census Tract 101     |
| 51089 | Henry County         | Census Tract 110     |
| 51089 | Henry County         | Census Tract 111     |
| 51089 | Henry County         | Census Tract 102     |
| 51089 | Henry County         | Census Tract 112     |
| 51091 | Highland County      | Census Tract 9701    |
| 51093 | Isle of Wight County | Census Tract 2801.05 |
| 51093 | Isle of Wight County | Census Tract 2803    |
| 51099 | King George County   | Census Tract 401     |
| 51103 | Lancaster County     | Census Tract 302     |
| 51105 | Lee County           | Census Tract 9503    |
| 51107 | Loudoun County       | Census Tract 6105.05 |
| 51107 | Loudoun County       | Census Tract 6117    |
| 51115 | Mathews County       | Census Tract 9514    |
| 51117 | Mecklenburg County   | Census Tract 9301.01 |
| 51117 | Mecklenburg County   | Census Tract 9302    |
| 51117 | Mecklenburg County   | Census Tract 9306    |
| 51117 | Mecklenburg County   | Census Tract 9304    |
| 51119 | Middlesex County     | Census Tract 9510    |
| 51121 | Montgomery County    | Census Tract 207     |

|       |                       |                      |
|-------|-----------------------|----------------------|
| 51121 | Montgomery County     | Census Tract 203     |
| 51121 | Montgomery County     | Census Tract 214     |
| 51121 | Montgomery County     | Census Tract 208     |
| 51125 | Nelson County         | Census Tract 9503    |
| 51131 | Northampton County    | Census Tract 9301    |
| 51131 | Northampton County    | Census Tract 9303    |
| 51131 | Northampton County    | Census Tract 9302    |
| 51133 | Northumberland County | Census Tract 201     |
| 51135 | Nottoway County       | Census Tract 3       |
| 51135 | Nottoway County       | Census Tract 1       |
| 51141 | Patrick County        | Census Tract 303.01  |
| 51141 | Patrick County        | Census Tract 302     |
| 51141 | Patrick County        | Census Tract 301     |
| 51143 | Pittsylvania County   | Census Tract 108.02  |
| 51143 | Pittsylvania County   | Census Tract 110.01  |
| 51143 | Pittsylvania County   | Census Tract 106     |
| 51143 | Pittsylvania County   | Census Tract 105     |
| 51147 | Prince Edward County  | Census Tract 9301    |
| 51147 | Prince Edward County  | Census Tract 9302.01 |
| 51153 | Prince William County | Census Tract 9004.03 |
| 51153 | Prince William County | Census Tract 9014.03 |
| 51153 | Prince William County | Census Tract 9006    |
| 51153 | Prince William County | Census Tract 9017.01 |
| 51153 | Prince William County | Census Tract 9019    |
| 51153 | Prince William County | Census Tract 9002.01 |
| 51155 | Pulaski County        | Census Tract 2102.01 |
| 51155 | Pulaski County        | Census Tract 2101    |
| 51155 | Pulaski County        | Census Tract 2106    |
| 51159 | Richmond County       | Census Tract 401     |
| 51161 | Roanoke County        | Census Tract 302.04  |
| 51163 | Rockbridge County     | Census Tract 9304    |
| 51163 | Rockbridge County     | Census Tract 9301    |
| 51165 | Rockingham County     | Census Tract 102     |
| 51167 | Russell County        | Census Tract 305     |
| 51169 | Scott County          | Census Tract 301     |
| 51169 | Scott County          | Census Tract 306     |
| 51171 | Shenandoah County     | Census Tract 407     |
| 51171 | Shenandoah County     | Census Tract 408     |
| 51171 | Shenandoah County     | Census Tract 405     |
| 51173 | Smyth County          | Census Tract 302     |
| 51173 | Smyth County          | Census Tract 307.01  |
| 51173 | Smyth County          | Census Tract 305     |
| 51175 | Southampton County    | Census Tract 2004    |

|       |                       |                      |
|-------|-----------------------|----------------------|
| 51177 | Spotsylvania County   | Census Tract 203.04  |
| 51177 | Spotsylvania County   | Census Tract 201.08  |
| 51177 | Spotsylvania County   | Census Tract 203.05  |
| 51183 | Sussex County         | Census Tract 8703    |
| 51183 | Sussex County         | Census Tract 8704    |
| 51183 | Sussex County         | Census Tract 8701    |
| 51185 | Tazewell County       | Census Tract 210     |
| 51185 | Tazewell County       | Census Tract 211     |
| 51187 | Warren County         | Census Tract 204     |
| 51187 | Warren County         | Census Tract 205     |
| 51191 | Washington County     | Census Tract 109     |
| 51191 | Washington County     | Census Tract 107     |
| 51191 | Washington County     | Census Tract 104.02  |
| 51191 | Washington County     | Census Tract 105.02  |
| 51191 | Washington County     | Census Tract 106.01  |
| 51193 | Westmoreland County   | Census Tract 102     |
| 51195 | Wise County           | Census Tract 9308    |
| 51195 | Wise County           | Census Tract 9315    |
| 51195 | Wise County           | Census Tract 9317    |
| 51195 | Wise County           | Census Tract 9312    |
| 51195 | Wise County           | Census Tract 9309    |
| 51197 | Wythe County          | Census Tract 504.02  |
| 51197 | Wythe County          | Census Tract 501     |
| 51197 | Wythe County          | Census Tract 502     |
| 51510 | Alexandria City       | Census Tract 2012.03 |
| 51520 | Bristol City          | Census Tract 204     |
| 51520 | Bristol City          | Census Tract 201     |
| 51520 | Bristol City          | Census Tract 202     |
| 51530 | Buena Vista City      | Census Tract 9306    |
| 51540 | Charlottesville City  | Census Tract 10      |
| 51540 | Charlottesville City  | Census Tract 8       |
| 51550 | Chesapeake City       | Census Tract 207     |
| 51550 | Chesapeake City       | Census Tract 203     |
| 51550 | Chesapeake City       | Census Tract 209.06  |
| 51550 | Chesapeake City       | Census Tract 211.01  |
| 51550 | Chesapeake City       | Census Tract 210.04  |
| 51550 | Chesapeake City       | Census Tract 208.05  |
| 51550 | Chesapeake City       | Census Tract 204     |
| 51570 | Colonial Heights City | Census Tract 8301    |
| 51580 | Covington City        | Census Tract 602     |
| 51590 | Danville City         | Census Tract 2       |
| 51590 | Danville City         | Census Tract 6       |
| 51590 | Danville City         | Census Tract 4       |

|       |                     |                      |
|-------|---------------------|----------------------|
| 51590 | Danville City       | Census Tract 13.01   |
| 51590 | Danville City       | Census Tract 13.02   |
| 51590 | Danville City       | Census Tract 5       |
| 51590 | Danville City       | Census Tract 14      |
| 51590 | Danville City       | Census Tract 7       |
| 51590 | Danville City       | Census Tract 12      |
| 51590 | Danville City       | Census Tract 8       |
| 51590 | Danville City       | Census Tract 1       |
| 51590 | Danville City       | Census Tract 9       |
| 51595 | Emporia City        | Census Tract 8902    |
| 51595 | Emporia City        | Census Tract 8901    |
| 51600 | Fairfax City        | Census Tract 3004    |
| 51620 | Franklin City       | Census Tract 901     |
| 51620 | Franklin City       | Census Tract 902     |
| 51630 | Fredericksburg City | Census Tract 5       |
| 51640 | Galax City          | Census Tract 701.01  |
| 51650 | Hampton City        | Census Tract 105.02  |
| 51660 | Harrisonburg City   | Census Tract 2.03    |
| 51660 | Harrisonburg City   | Census Tract 2.05    |
| 51660 | Harrisonburg City   | Census Tract 4.02    |
| 51660 | Harrisonburg City   | Census Tract 3.02    |
| 51660 | Harrisonburg City   | Census Tract 2.07    |
| 51670 | Hopewell City       | Census Tract 8203    |
| 51670 | Hopewell City       | Census Tract 8206    |
| 51680 | Lynchburg City      | Census Tract 7       |
| 51683 | Manassas City       | Census Tract 9103.01 |
| 51683 | Manassas City       | Census Tract 9102.01 |
| 51690 | Martinsville City   | Census Tract 2       |
| 51690 | Martinsville City   | Census Tract 1       |
| 51690 | Martinsville City   | Census Tract 3       |
| 51690 | Martinsville City   | Census Tract 4       |
| 51700 | Newport News City   | Census Tract 316.02  |
| 51700 | Newport News City   | Census Tract 320.06  |
| 51710 | Norfolk City        | Census Tract 27      |
| 51710 | Norfolk City        | Census Tract 37      |
| 51710 | Norfolk City        | Census Tract 42      |
| 51710 | Norfolk City        | Census Tract 57.01   |
| 51710 | Norfolk City        | Census Tract 69.01   |
| 51720 | Norton City         | Census Tract 9601    |
| 51730 | Petersburg City     | Census Tract 8112    |
| 51730 | Petersburg City     | Census Tract 8103    |
| 51730 | Petersburg City     | Census Tract 8101    |
| 51740 | Portsmouth City     | Census Tract 2115    |

|       |                     |                      |
|-------|---------------------|----------------------|
| 51740 | Portsmouth City     | Census Tract 2121    |
| 51740 | Portsmouth City     | Census Tract 2109    |
| 51740 | Portsmouth City     | Census Tract 2123    |
| 51740 | Portsmouth City     | Census Tract 2111    |
| 51740 | Portsmouth City     | Census Tract 2126    |
| 51740 | Portsmouth City     | Census Tract 2128.02 |
| 51740 | Portsmouth City     | Census Tract 2124    |
| 51750 | Radford City        | Census Tract 101.01  |
| 51770 | Norfolk City        | Census Tract 10      |
| 51770 | Norfolk City        | Census Tract 11      |
| 51770 | Norfolk City        | Census Tract 25      |
| 51770 | Norfolk City        | Census Tract 30      |
| 51770 | Norfolk City        | Census Tract 3       |
| 51770 | Norfolk City        | Census Tract 5       |
| 51770 | Norfolk City        | Census Tract 9       |
| 51770 | Norfolk City        | Census Tract 26      |
| 51770 | Norfolk City        | Census Tract 6.02    |
| 51775 | Salem City          | Census Tract 103     |
| 51790 | Staunton City       | Census Tract 6       |
| 51800 | Suffolk City        | Census Tract 757.01  |
| 51800 | Suffolk City        | Census Tract 754.01  |
| 51800 | Suffolk City        | Census Tract 653     |
| 51800 | Suffolk City        | Census Tract 654     |
| 51800 | Suffolk City        | Census Tract 655     |
| 51800 | Suffolk City        | Census Tract 757.02  |
| 51810 | Virginia Beach City | Census Tract 426     |
| 51810 | Virginia Beach City | Census Tract 440.04  |
| 51810 | Virginia Beach City | Census Tract 440.03  |
| 51810 | Virginia Beach City | Census Tract 402     |
| 51810 | Virginia Beach City | Census Tract 442     |
| 51810 | Virginia Beach City | Census Tract 404.02  |
| 51810 | Virginia Beach City | Census Tract 448.08  |
| 51810 | Virginia Beach City | Census Tract 410.02  |
| 51810 | Virginia Beach City | Census Tract 462.13  |
| 51810 | Virginia Beach City | Census Tract 458.01  |
| 51820 | Waynesboro City     | Census Tract 31      |
| 51820 | Waynesboro City     | Census Tract 35      |

---

Table S2. Census tracts with significantly elevated relative risk for vape shop outlets

| <b>FIPS</b> | <b>County Name</b>    | <b>Census Tract</b> |
|-------------|-----------------------|---------------------|
| 51153       | Prince William County | Census Tract 9019   |
| 51161       | Roanoke County        | Census Tract 302.04 |
| 51187       | Warren County         | Census Tract 204    |
| 51197       | Wythe County          | Census Tract 502    |
| 51520       | Bristol City          | Census Tract 204    |
| 51540       | Charlottesville City  | Census Tract 10     |
| 51550       | Chesapeake City       | Census Tract 215.02 |
| 51550       | Chesapeake City       | Census Tract 208.05 |
| 51570       | Colonial Heights City | Census Tract 8301   |
| 51590       | Danville City         | Census Tract 8      |
| 51630       | Fredericksburg City   | Census Tract 5      |
| 51660       | Harrisonburg City     | Census Tract 2.07   |
| 51710       | Norfolk City          | Census Tract 49     |
| 51710       | Norfolk City          | Census Tract 57.01  |
| 51710       | Norfolk City          | Census Tract 69.01  |
| 51710       | Norfolk City          | Census Tract 70.02  |
| 51720       | Norfolk City          | Census Tract 9601   |
| 51770       | Norfolk City          | Census Tract 11     |
| 51810       | Virginia Beach City   | Census Tract 440.04 |
| 51810       | Virginia Beach City   | Census Tract 456.04 |
| 51810       | Virginia Beach City   | Census Tract 448.08 |
| 51810       | Virginia Beach City   | Census Tract 410.02 |
| 51810       | Virginia Beach City   | Census Tract 462.13 |
| 51810       | Virginia Beach City   | Census Tract 454.08 |
| 51810       | Virginia Beach City   | Census Tract 458.01 |
